# Supplementary material for: Performance analysis for time-frequency MUSIC algorithm in presence of both additive noise and array calibration errors
Source: Springer Nature journal article supplement (doi:10.1186/1687-6180-2012-94), 2012-04-30

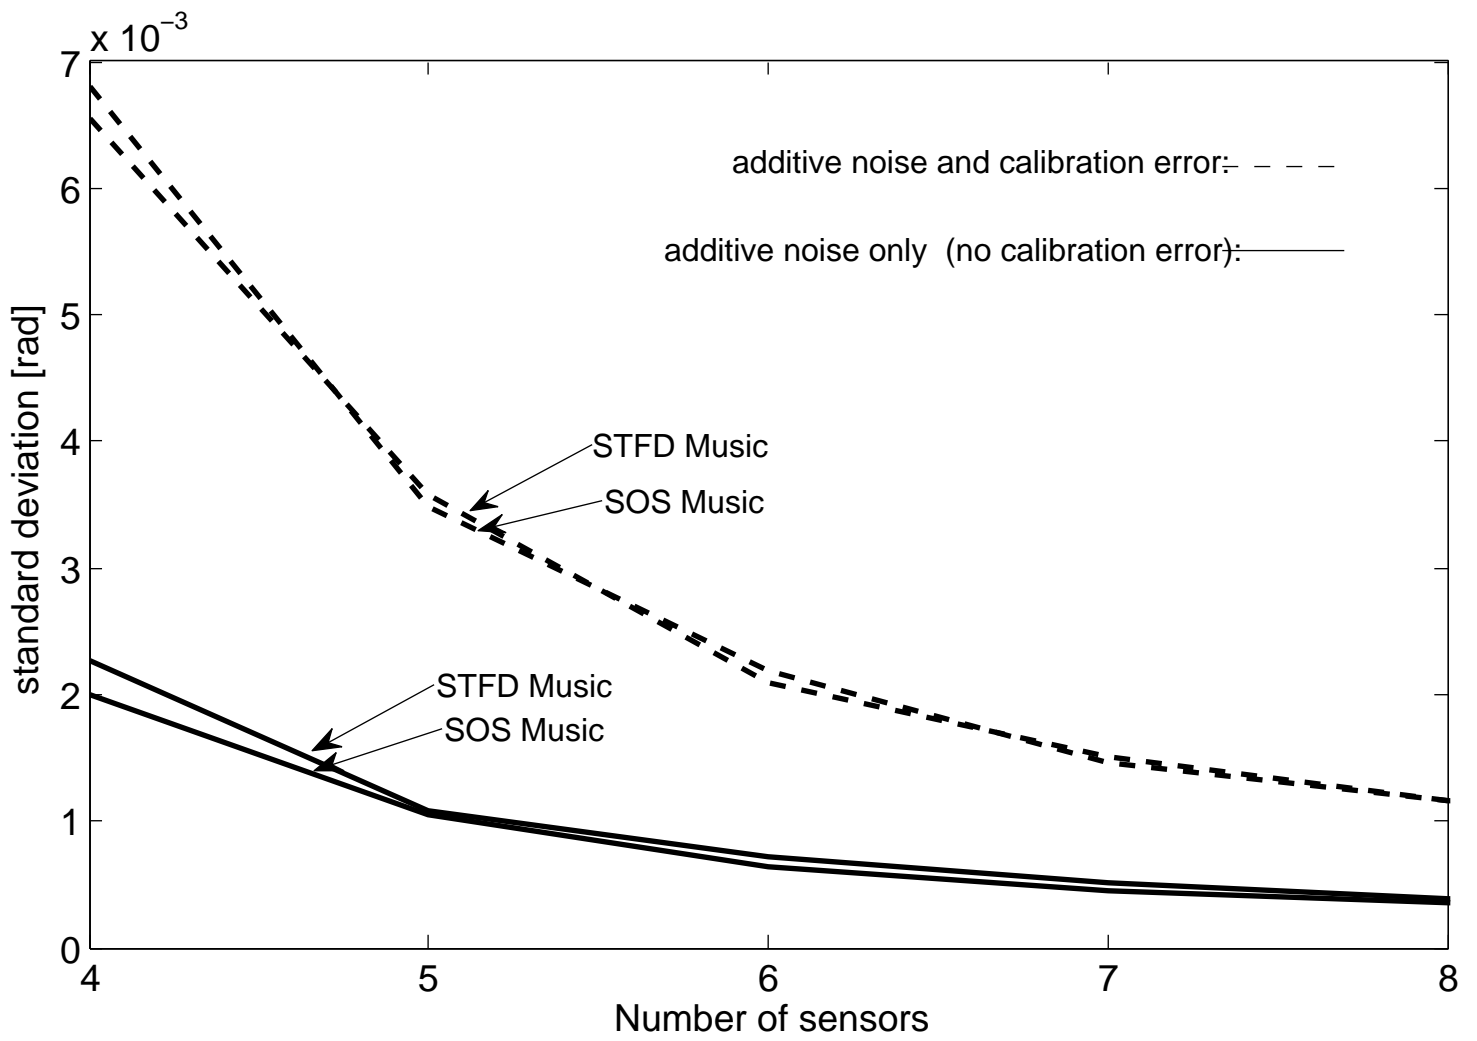

Supplement: 13634_2011_204_MOESM7_ESM.pdf [file 13634_2011_204_MOESM7_ESM.pdf]
